# Supplementary material
Source: publisher site journal article supplement (https://www.dovepress.com/get_supplementary_file.php?f=459792.docx)
Supplement: Supplementary file 1 [file get_supplementary_file.php]

Supplementary material


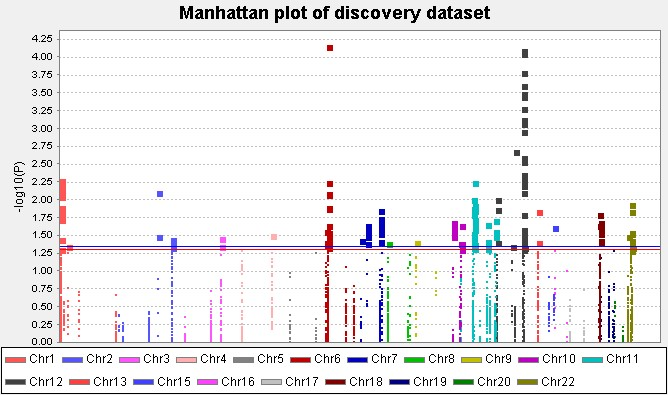


**A**

**B**

**Figure S1.** The Manhattan plot. (A) The Manhattan plot for 4,698 SNPs in the discovery dataset. (B) The Manhattan plot for 236 SNPs in the replication dataset. The red horizontal line indicates *P* = 0.05, and the blue horizontal line represents an BFDP = 0.80.


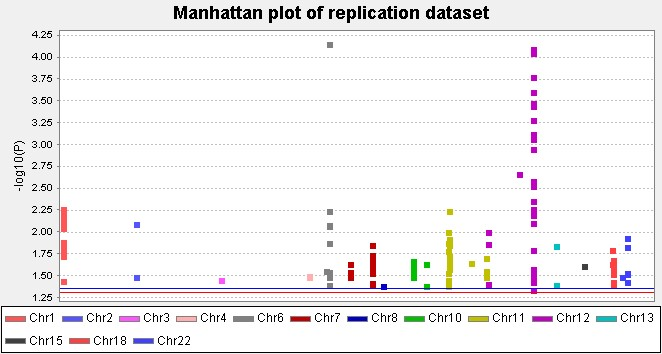


*CD82*

rs7925603 A>G

*PMAIP1*

rs7925603 A>G


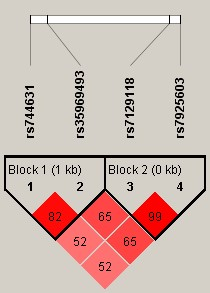

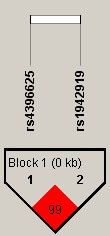


**A**

**B**

**Figure S2.** The linkage disequilibrium plot of genetic variants in *CD82* (A) and *PMAIP1* (B).

**A**


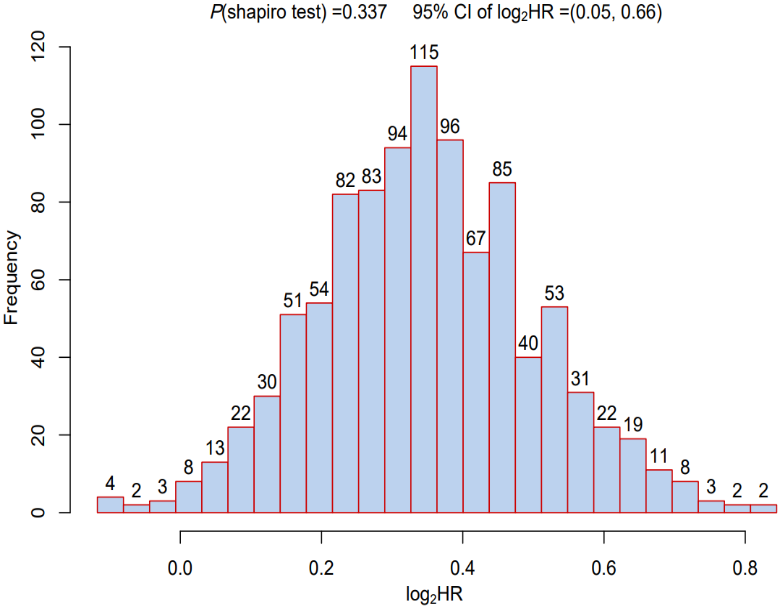

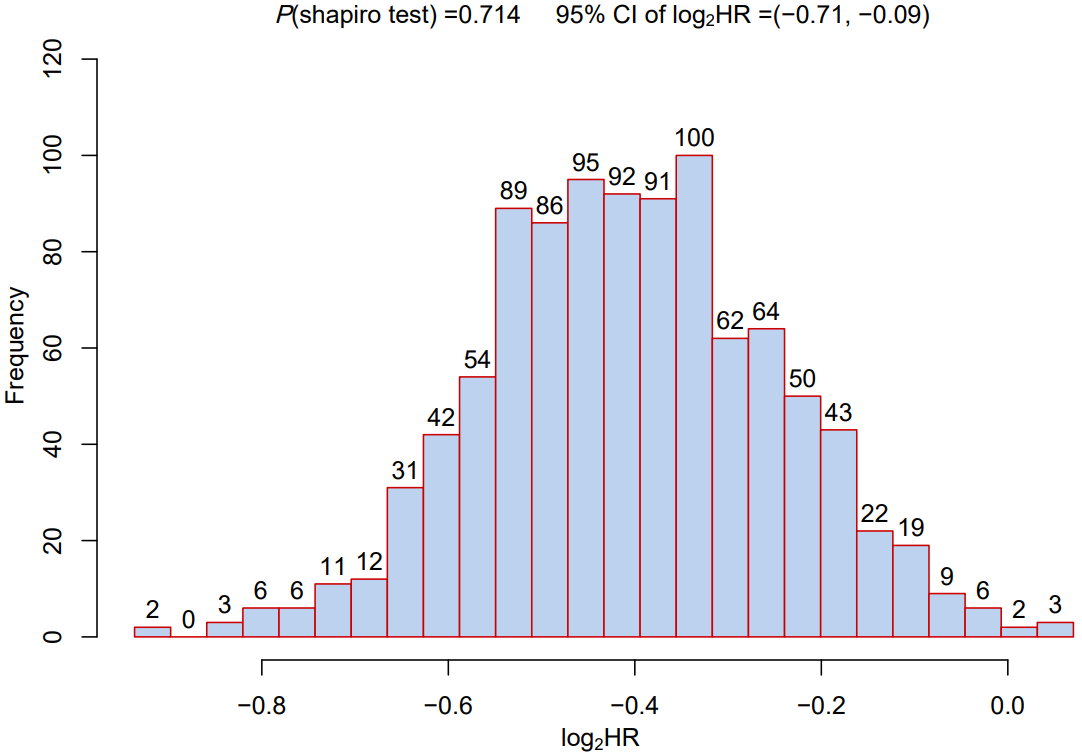


**B**

**Figure S3.** The distribution histogram of 1000 HR after grouped by bootstrapping for 1000 times in a dominant model. (A) *CD82* rs7925603 AG/GG vs. AA and (B) *PMAIP1* rs4396625 AT/TT vs. AA.

*CD82*, rs7925603

liver

*P* =0.246

**A**

*PMAIP1*, rs4396625

liver

*P* =0.378

**Figure S4.** The e-QTL analysis of the significant SNPs *CD82* rs7925603 A > G and *PMAIP1* rs4396625 A > T. (A) The association between *CD82* rs7925603 A > G and mRNA expression levels of *CD82* in normal liver tissues from the GTEx database; (B)The association between *CD82* rs7925603 A > G and mRNA expression levels of *CD82* from the 1000 Genomes phase 3. CHB, Han Chinese in Beijing; (C)The association between *CD82* rs7925603 A > G and mRNA expression levels of *CD82* from the 1000 Genomes phase 3. EUR, European; (D) The association between *PMAIP1* rs4396625 A > T and mRNA expression levels of *PMAIP1* in normal liver tissues from the GTEx database; (E)The association between *PMAIP1* rs4396625 A > T and mRNA expression levels of *PMAIP1* from the 1000 Genomes phase 3. CHB, Han Chinese in Beijing; (F)The association between *PMAIP1* rs4396625 A > T and mRNA expression levels of *PMAIP1* from the 1000 Genomes phase 3. EUR, European.


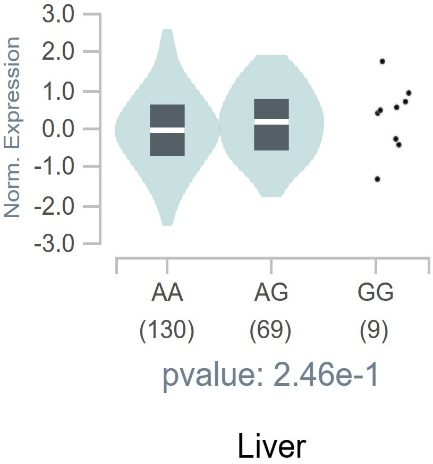

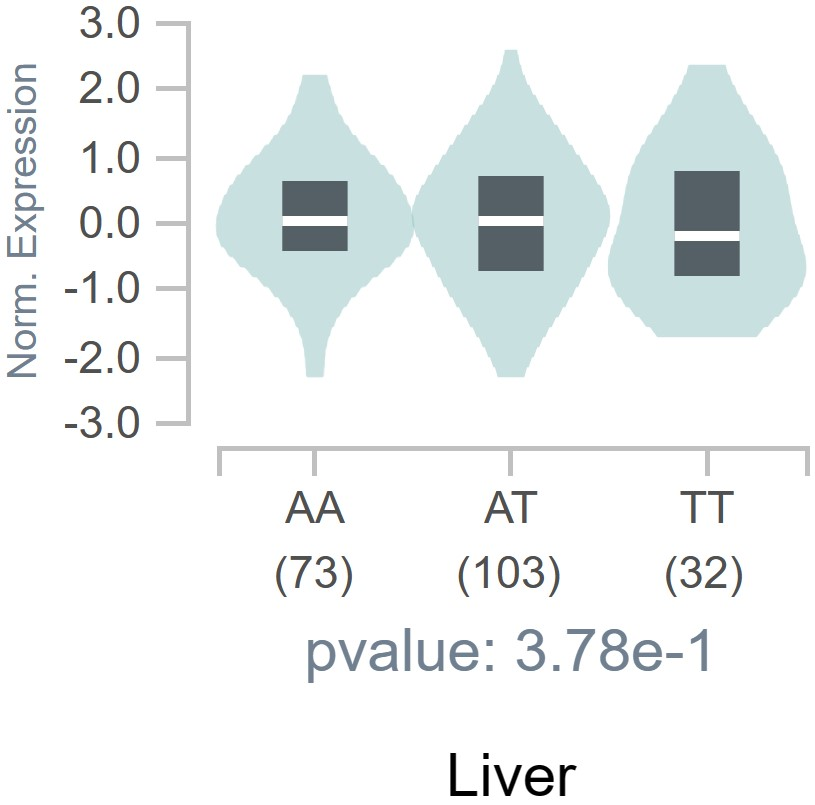

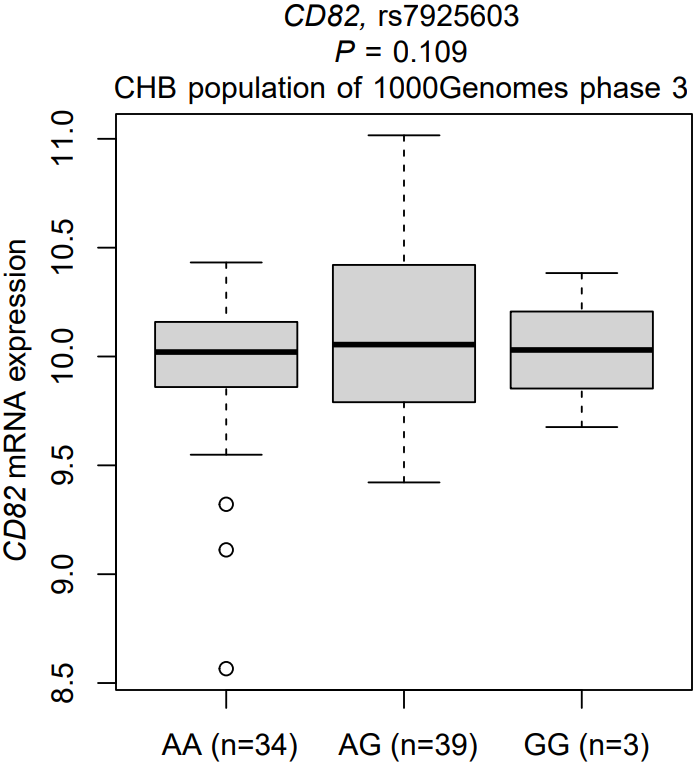


**B**

**D**


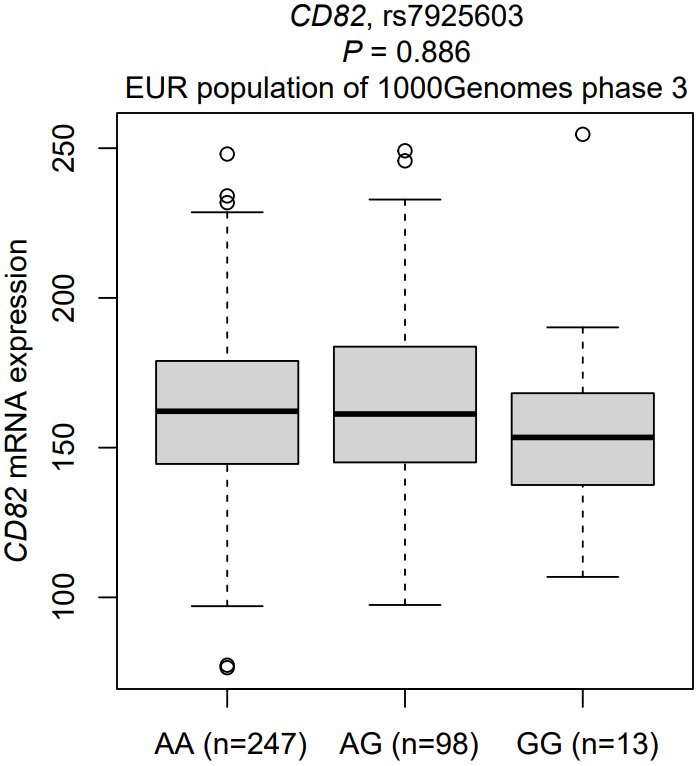


**C**


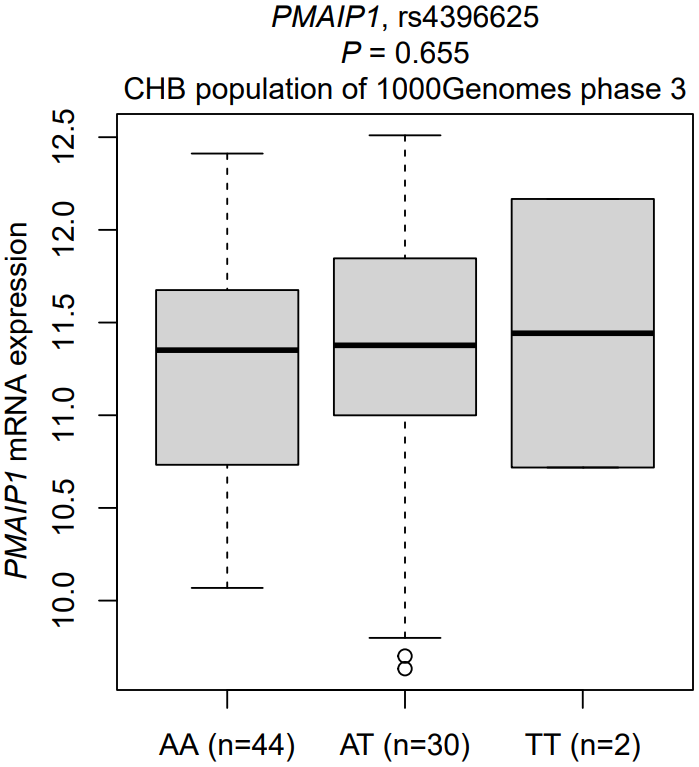


**E**


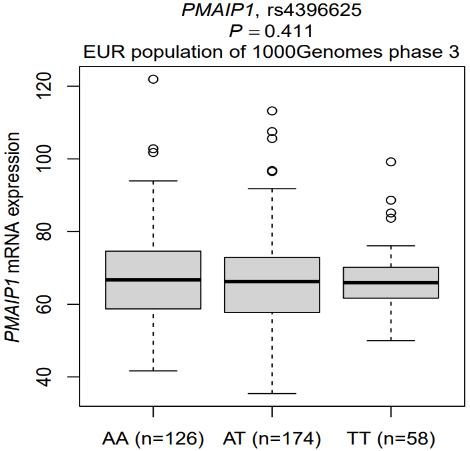


**F**


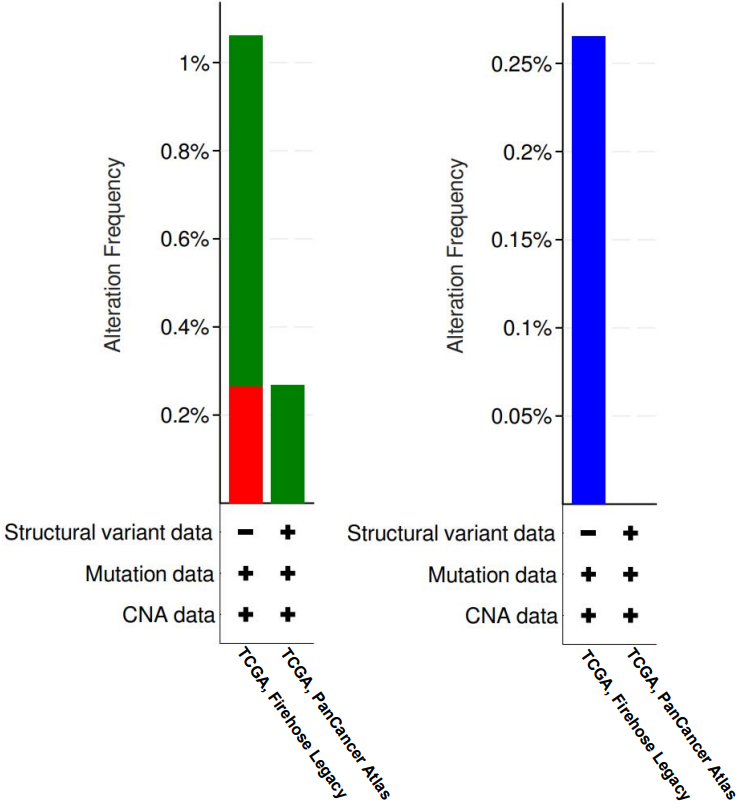


**A**

**B**

**Figure S5.** The somatic mutations analysis of *CD82* (A) and *PMAIP1* (B) in HCC tissues by using the cBioPortal database.

**Table S1.** List of 70 p53 signaling pathway genes from MsigDB

| **Dataset** | **Name of pathway** | **Selected genes** | Number of genes |
| --- | --- | --- | --- |
| WP | BIOCARTA_P53_SIGNALING_PATHWAY | *CDK2, TP53, PCNA, MDM2, ATM, CDK4, RB1, TIMP3, CDKN1A, BCL2, APAF1, GADD45A, CCNE1, BAX, E2F1, CCND1* | 16 |
| KEGG | P53_SIGNALING_PATHWAY | *CDK2, CDK4, CDK6, CDKN1A, CDKN2A, GADD45G, CHEK1, CHEK2, SESN3, DDB2, GADD45A, RCHY1, BBC3, SESN1, SFN, APAF1, IGF1, IGFBP3, FAS, CD82, MDM2, MDM4, GADD45B, ATM, RRM2B, SERPINE1, SHISA5, GTSE1, SERPINB5, PMAIP1, CYCS, ATR, STEAP3, PIDD1, RPRM, PTEN, ADGRB1, BAX, CCND1, RRM2, BID, TP53AIP1, PERP, COP1, ZMAT3, SIAH1, THBS1, TP53, TP73, TSC2, CASP3, SESN2, CASP8, CASP9, PPM1D, CCNB3, TNFRSF10B, CCNB1, CCND2, CCND3, CCNE1, CCNG1, CCNG2, CCNB2, CCNE2, EI24, TP53I3, CDK1,* | 68 |
| Exclude |  | 11 duplicated genes, 2 genes are not in the hg19 reference and 1 gene (*CCNB3*) on the X chromosome | 14 |
| All |  |  | 70 |

Keyword: p53

Organism: Homo sapiens

**Table S2.** The associations of demographics and clinical characteristics with OS of HBV-HCC patients

| **Variables** | **Whole dataset (n = 866)** | | **MST**  **(Month)** | **Univariable analysis** | | **Multivariable analysis** | |
| --- | --- | --- | --- | --- | --- | --- | --- |
| **ALL** | **Deaths (%)** | **HR (95% CI)** | ***P*** | **HR (95% CI) a** | ***P*a** |
| All subjects | 866 | 419 (48.38) | 39.05 | - | - | - | - |
| **Age b** |  |  |  |  |  |  |  |
| ≤ 47 | 434 | 233 (53.69) | 47.00 | 1.00 |  | 1.00 |  |
| > 47 | 432 | 186 (43.06) | 82.60 | 0.72 (0.59-0.87) | < 0.001 | 0.81 (0.66-0.99) | 0.036 |
| **Sex** |  |  |  |  |  |  |  |
| Female | 106 | 42 (39.62) | 66.97 | 1.00 |  | 1.00 |  |
| Male | 760 | 377 (49.61) | 71.98 | 1.25 (0.90-1.71) | 0.179 | 1.26 (0.90-1.76) | 0.176 |
| **Smoking** |  |  |  |  |  |  |  |
| Never | 545 | 268 (49.17) | 62.00 | 1.00 |  | 1.00 |  |
| Ever | 321 | 151 (47.04) | 60.00 | 0.96 (0.79-1.18) | 0.724 | 0.91 (0.71-1.17) | 0.475 |
| **Drinking** |  |  |  |  |  |  |  |
| Never | 614 | 292 (47.56) | 66.00 | 1.00 |  | 1.00 |  |
| Eve**r** | 252 | 127 (59.40) | 54.00 | 1.07 (0.87-1.32) | 0.500 | 1.08 (0.84-1.41) | 0.541 |
| **AFP (ng/ml)** |  |  |  |  |  |  |  |
| ≤ 400 | 522 | 232 (44.44) | 70.30 | 1.00 |  | 1.00 |  |
| > 400 | 344 | 187 (54.36) | 39.10 | 1.59 (1.31-1.93) | < 0.001 | 1.29 (1.05-1.57) | 0.015 |
| **Cirrhosis** |  |  |  |  |  |  |  |
| Never | 390 | 184 (47.18) | 61.90 | 1.00 |  | 1.00 |  |
| Ever | 476 | 235 (49.37) | 61.50 | 1.00 (0.82-1.22) | 0.996 | 1.04 (0.85-1.41) | 0.702 |
| **Cancer embolus** |  |  |  |  |  |  |  |
| Never | 636 | 260 (40.88) | 90.60 | 1.00 |  | 1.00 |  |
| Ever | 230 | 159 (69.13) | 23.10 | 2.73 (2.32-3.34) | < 0.001 | 1.74 (1.38-2.21) | < 0.001 |
| **BCLC Stage** |  |  |  |  |  |  |  |
| 0/A | 427 | 146 (34.19) | 99.60 | 1.00 |  | 1.00 |  |
| B/C | 439 | 273 (62.19) | 30.10 | 2.73 (2.23-3.35) | < 0.001 | 1.98 (1.56-2.52) | < 0.001 |

a The adjusted variables for Cox proportional hazards regression analysis were age, sex, smoking, drinking, AFP, cirrhosis, cancer embolus, BCLC stage;

b The median age in the whole dataset was 47 years old.

Abbreviations: OS, overall survival; HBV: hepatitis B virus; HCC, hepatocellular carcinoma; MST: median survival time; HR: hazards ratio; CI: confidence interval; AFP: alpha-fetoprotein; BCLC: Barcelona clinic liver cancer.
